# Supplementary material for: Identification of Microorganisms from Several Surfaces by MALDI-TOF MS: P. aeruginosa Is Leading in Biofilm Formation
Source: MDPI journal article supplement (doi:10.3390/microorganisms9050992), 2021-05-04
Supplement: s1 [file s1]

# Supplementary

**Table S1.** Overview of monoculture biofilm formation behavior of different bacterial to the Congo Red Agar (CRA) method... CRA were visually scored by using a scoring board shown in Supp. 1.

| Bacteria                    | CRA      |
|-----------------------------|----------|
| <i>P. aeruginosa</i>        | None     |
| <i>P. mendocina</i>         | None     |
| <i>P. oleovorans</i>        | None     |
| <i>P. pseudoalcaligenes</i> | None     |
| <i>P. stutzeri</i>          | None     |
| <i>S. arlettae</i>          | Moderate |
| <i>S. capitis</i>           | High     |
| <i>S. epidermidis</i>       | High     |
| <i>S. hominis</i>           | High     |
| <i>S. haemolyticus</i>      | High     |
| <i>S. saprophyticus</i>     | High     |
| <i>E. coli</i>              | None     |
| <i>P. putida</i>            | None     |

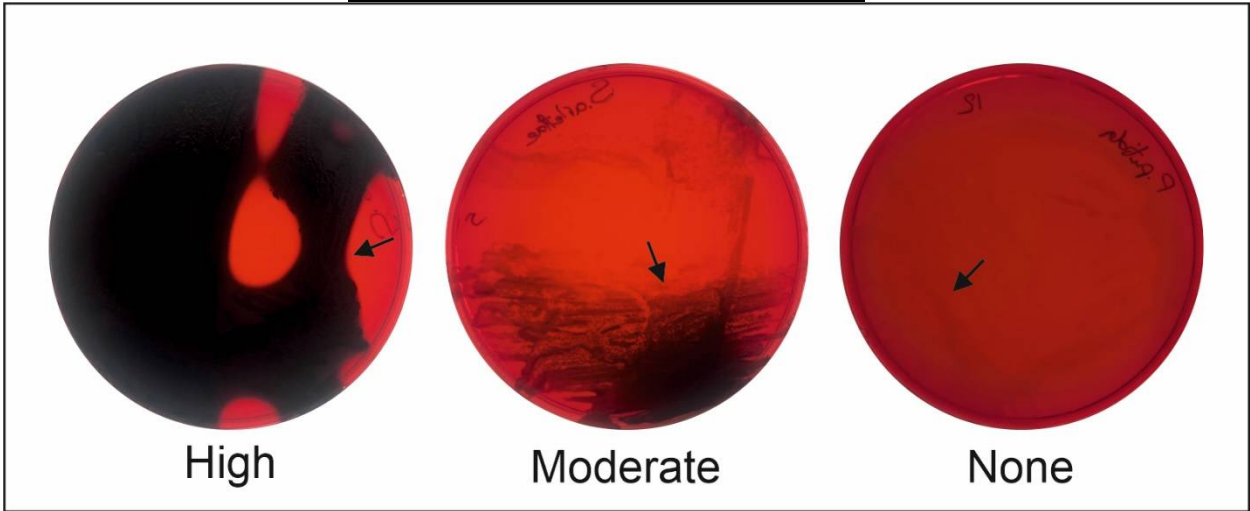

**Figure S1.** Examples of the quantification of Biofilm intensity for Congo Red Agar, left plate (*S. epidermidis*) represent biofilm producing bacteria as dark black colonies (marked by arrows), middle

plate (*S. arlettae*) shows moderate biofilm potential by light dark colonies (marked by arrows) and right plate (*P. putida*) reveals no biofilm forming bacteria, note no dark colonies.

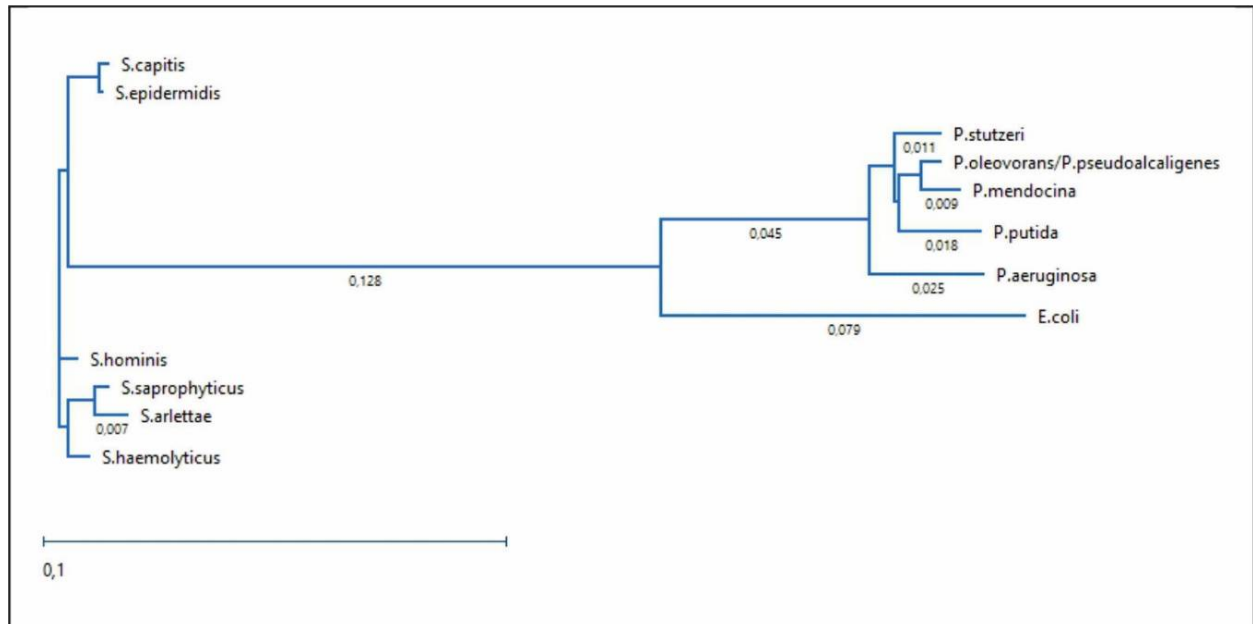

**Figure S2.** Phylogenetic tree of 16S rRNA sequences of Staphylococci, Pseudomonads, and Escherichia coli. To show the homology between the 16S rRNA sequences between the species we performed a multiple sequence alignment of published 16S rRNA sequences for Staphylococci and Pseudomonads, followed by a neighbor joining phylogenetic tree tool (DNASTAR).
